# Supplementary material for: Microbiome research outlook: past, present, and future
Source: PubMed Central journal article supplement (PMC10599639; doi:10.1093/procel/pwad031), 2023-05-23

## Supplementary Figures

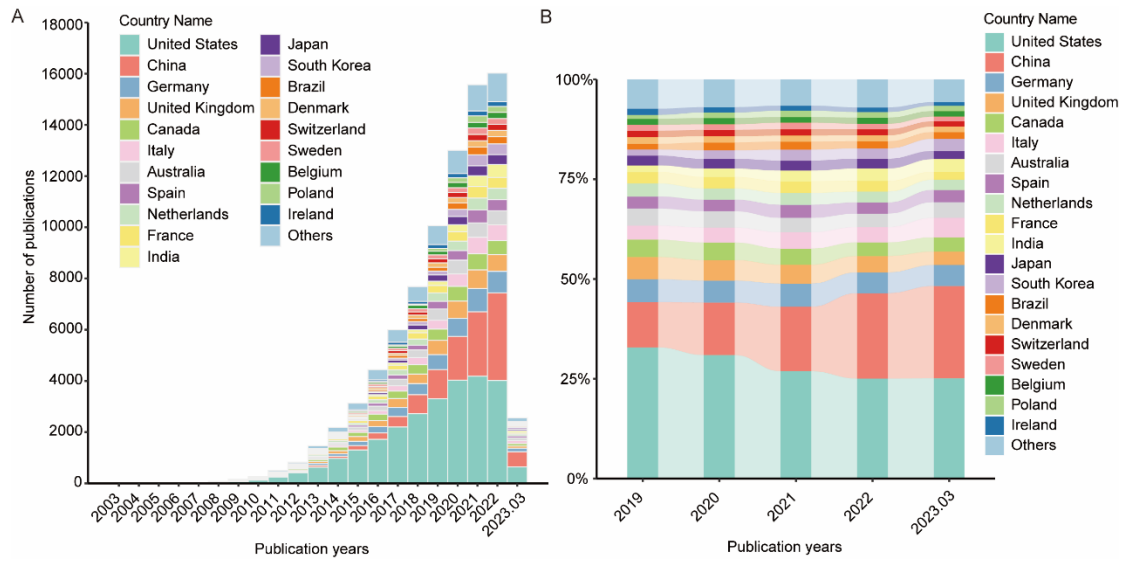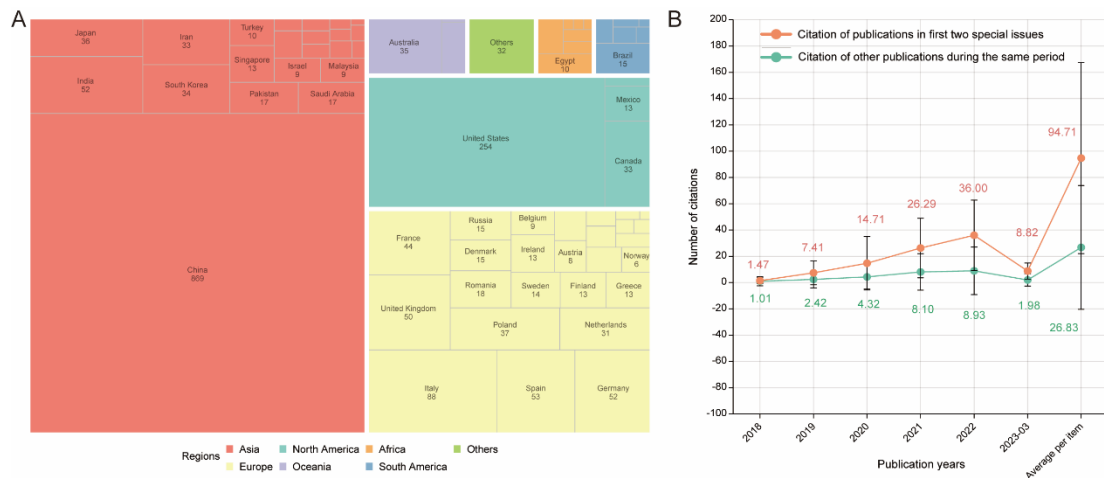

Supplement: pwad031_suppl_supplementary_figures.pdf [file pwad031_suppl_supplementary_figures.pdf]
